# Supplementary material for: Functionalized cyclopentadienyl rhodium(iii) bipyridine complexes: synthesis, characterization, and catalytic application in hydrogenation of ketones
Source: Royal Society of Chemistry journal article supplement (doi:10.1039/c3dt50445j), 2013-01-01
Supplement: c3dt50445j.pdf [file c3dt50445j.pdf]

**Functionalized cyclopentadienyl rhodium(III) bipyridine complexes:**

**Synthesis, characterization, and catalytic Application**

**in hydrogenation of ketones**

*Wan-Hui Wang,<sup>a,b</sup> Yuki Suna,<sup>a</sup> Yuichiro Himeda,<sup>a,b,\*</sup> James T. Muckerman,<sup>c</sup> and Etsuko Fujita<sup>c</sup>*

<sup>a</sup>National Institute of Advanced Industrial Science and Technology, Tsukuba Central 5-2, 1-1-1

Higashi, Tsukuba, Ibaraki 305-8565, Japan

<sup>b</sup>JST, ACT-C, 4-1-8 Honcho, Kawaguchi, Saitama, 332-0012 Japan

<sup>c</sup>Chemistry Department, Brookhaven National Laboratory, Upton, NY 11973, USA.

**Electronic Supporting Information**

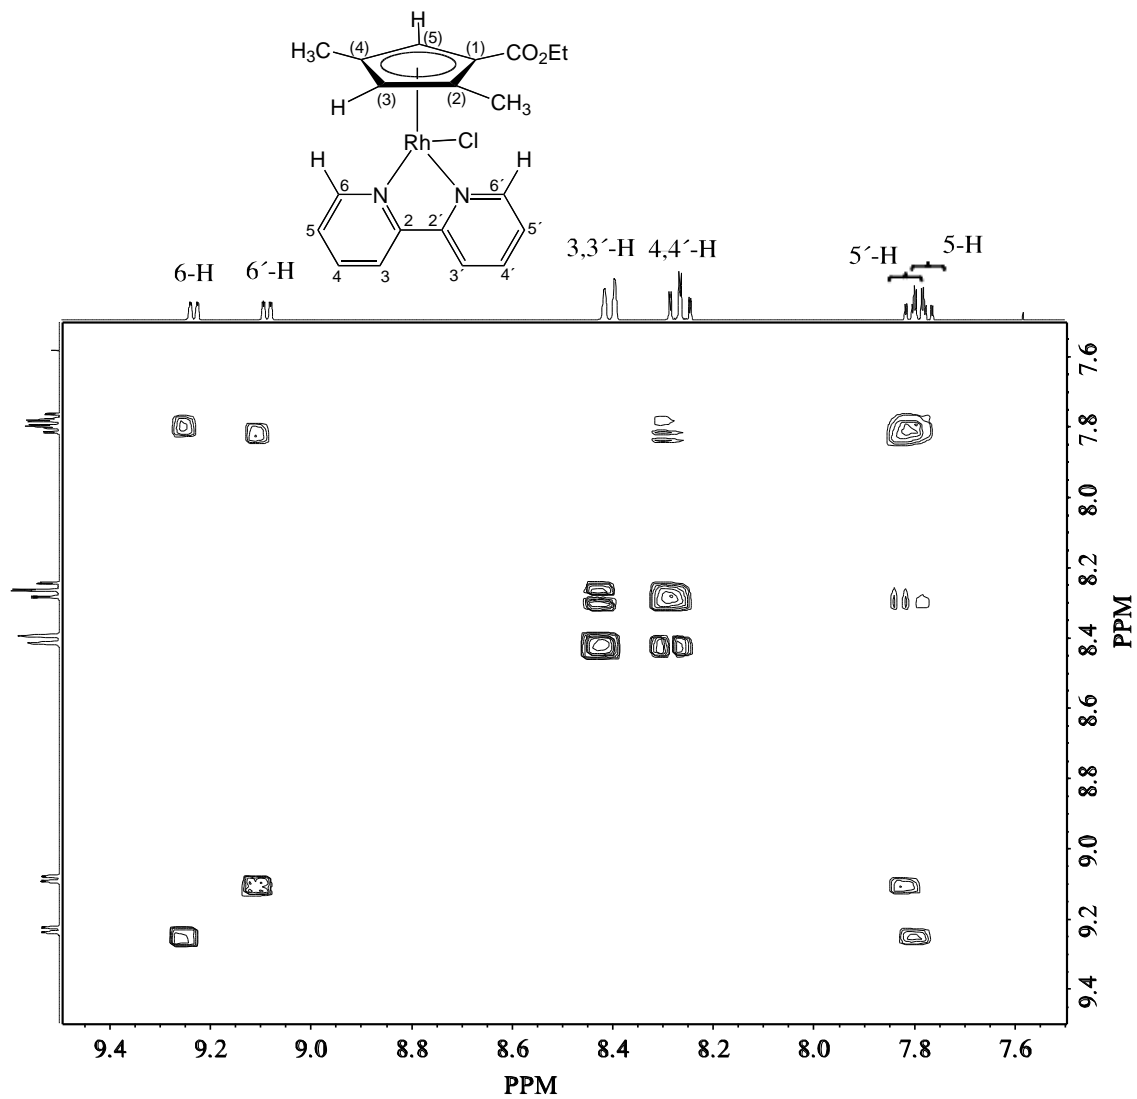

**Figure S1.** H-H COSY spectrum of **3** in CD<sub>3</sub>CN.

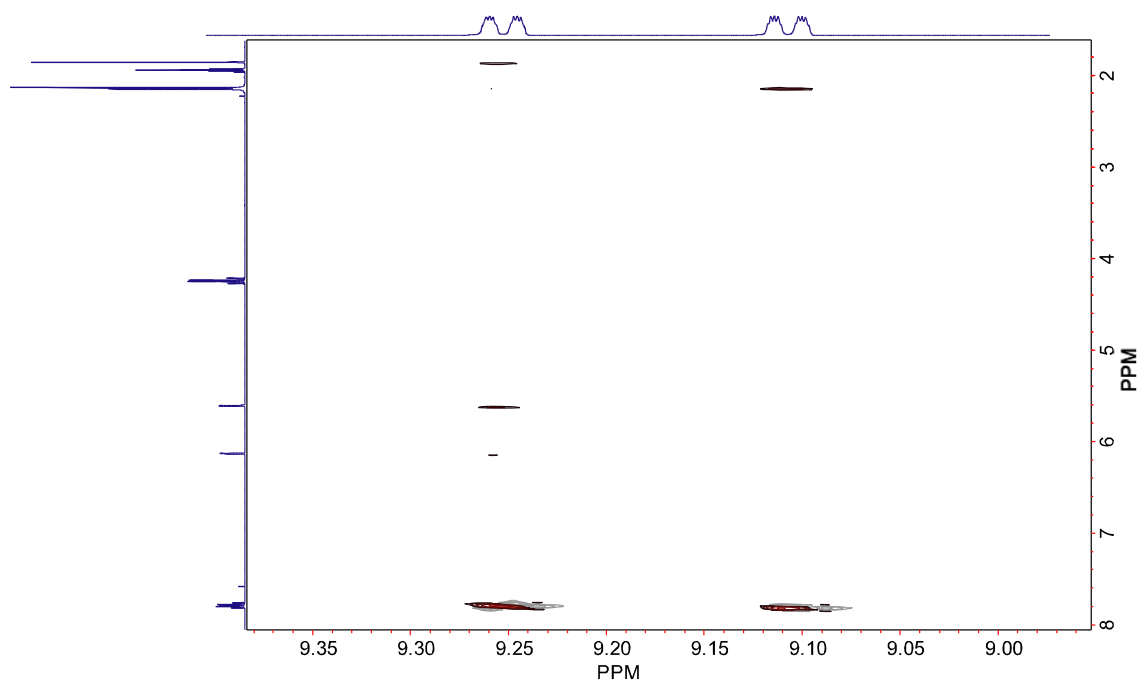

**Figure S2.** NOESY spectrum of **3** in CD<sub>3</sub>CN.

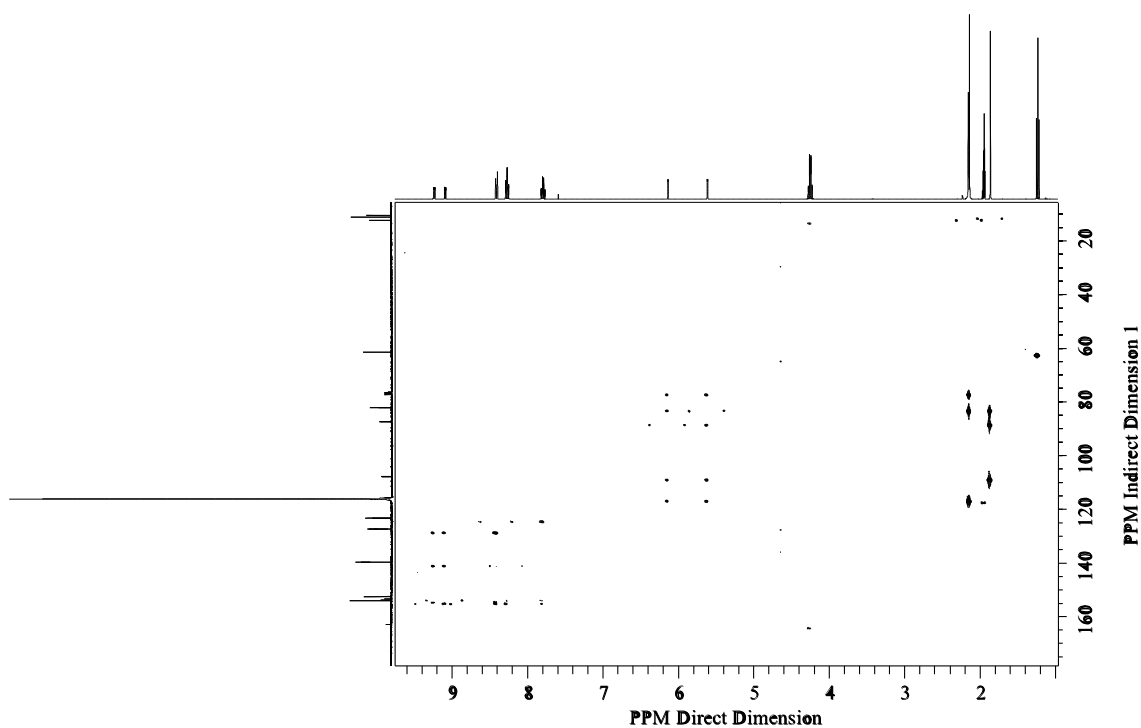

**Figure S3.** HMBC spectrum of **3** in CD<sub>3</sub>CN.

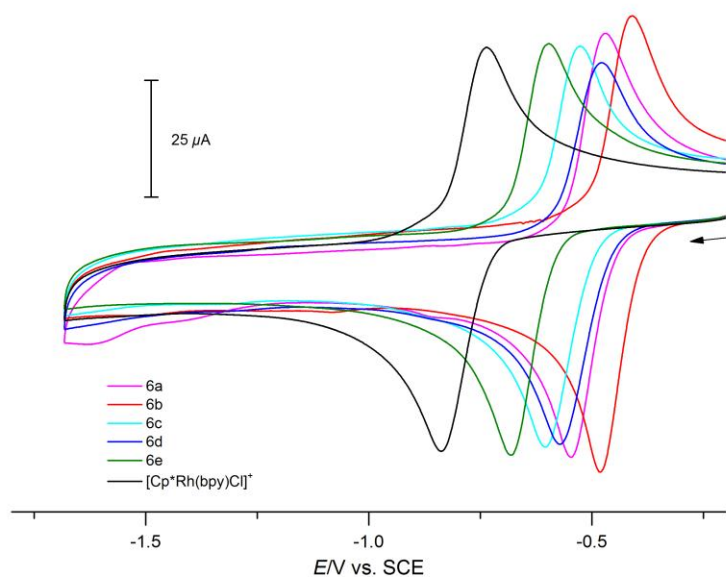

**Figure S4.** Cyclic voltammograms of [Cp\*Rh(bpy)Cl]<sup>+</sup> and **6a–e** obtained in CH<sub>3</sub>CN containing 0.1 M TBAPF<sub>6</sub> with a scan rate of 100 mV s<sup>-1</sup>. Ferrocene was employed as an internal standard, and its Fe<sup>(II/III)</sup> half-wave potential ( $E_{1/2}$ ) was taken to be +0.40 V vs SCE.

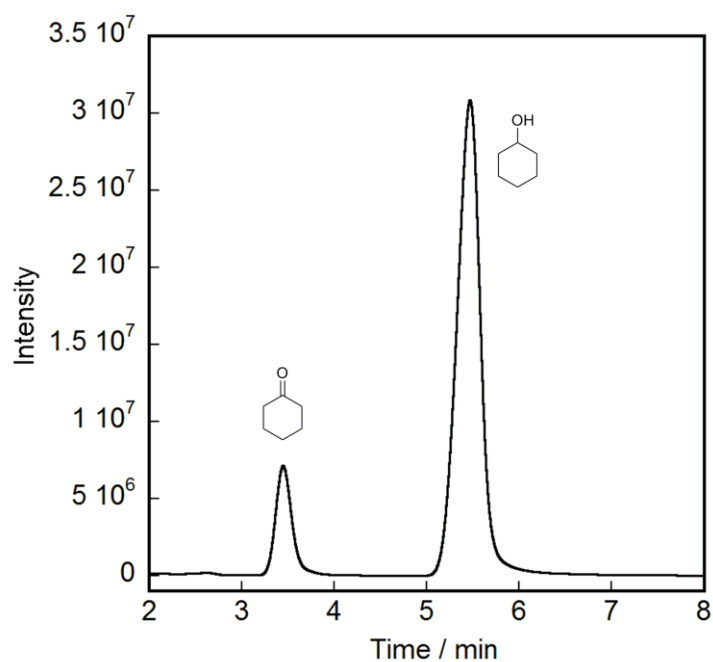

**Figure S4.** GC analysis of the hydrogenation of cyclohexanone with complex **6d**.

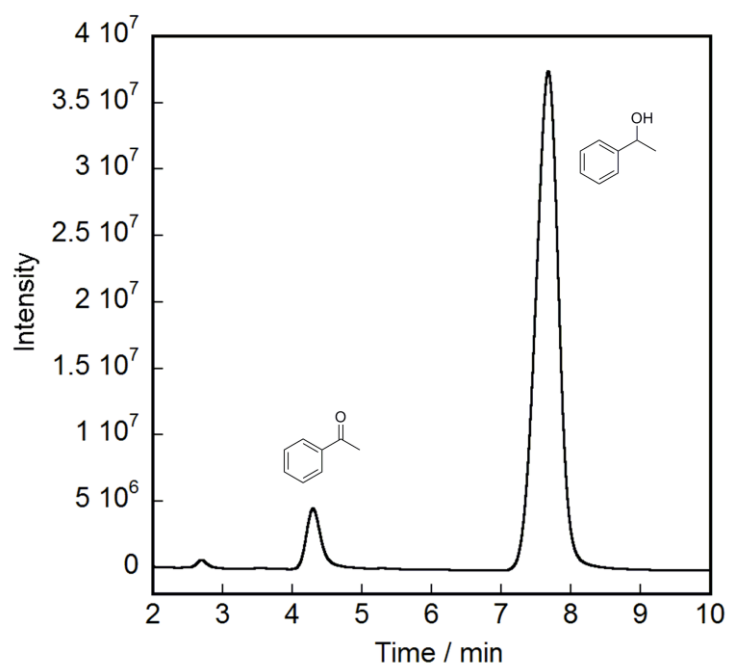

**Figure S5.** GC analysis of the hydrogenation of acetophenone with complex **6e**.

**X-ray crystallographic experiment:** X-ray data were obtained with a Bruker SMART-CCD diffractometer. Structural determination and refinement were performed by using Crystals.[1] Molecular graphics is drawn with Mercury.[2]

**Table S1.** Crystal data and structure refinement details for complex **6e**.

|                                             |                                                                                                               |
|---------------------------------------------|---------------------------------------------------------------------------------------------------------------|
| Formula                                     | C <sub>24</sub> H <sub>27</sub> Br <sub>1</sub> Cl <sub>1</sub> N <sub>2</sub> O <sub>7</sub> Rh <sub>1</sub> |
| Formula Weight                              | 673.75                                                                                                        |
| Crystal System                              | Monoclinic                                                                                                    |
| Space group                                 | P21/c                                                                                                         |
| <i>a</i> , [Å]                              | 14.9471(8)                                                                                                    |
| <i>b</i> , [Å]                              | 10.5506(6)                                                                                                    |
| <i>c</i> , [Å]                              | 16.8312(10)                                                                                                   |
| $\alpha$ , [°]                              | 90                                                                                                            |
| $\beta$ , [°]                               | 95.793(1)                                                                                                     |
| $\gamma$ , [°]                              | 90                                                                                                            |
| <i>V</i> , [Å <sup>3</sup> ]                | 2640.7(3)                                                                                                     |
| <i>Z</i>                                    | 4                                                                                                             |
| D(calc), [g cm <sup>-3</sup> ]              | 1.695                                                                                                         |
| Temperature, (K)                            | 293                                                                                                           |
| Crystal Size, [mm]                          | 0.21 x 0.25 x 0.55                                                                                            |
| $\mu$ (Mo-K $\alpha$ ), [mm <sup>-1</sup> ] | 2.307                                                                                                         |
| F(000)                                      | 1352                                                                                                          |
| Reflections collected / Unique              | 16362 / 6050                                                                                                  |
| R(int)                                      | 0.025                                                                                                         |
| Used reflections                            | 3763                                                                                                          |
| Parameters                                  | 326                                                                                                           |
| <i>R</i>                                    | 0.0369                                                                                                        |
| wR <sub>2</sub>                             | 0.0583                                                                                                        |
| <i>S</i>                                    | 1.09                                                                                                          |

## References:

- [1] a) Betteridge, P. W., Carruthers, J. R., Cooper, R. I., Prout, K. & Watkin, D. J. (2003). *J. Appl. Cryst.* **36**, 1487. b) Altomare, A., Cascarano, G., Giacovazzo, C., Guagliardi, A., Burla, M. C., Polidori, G. & Camalli, M. (1994). *J. Appl. Cryst.* **27**, 435. c) Sheldrick, G. M. (2008). *Acta Cryst.* **A64**, 112-122.
- [2] Macrae, C. F., Edgington, P. R., McCabe, P., Pidcock, E., Shields, G. P., Taylor, R., Towler, M. & van de Streek, J. (2006). *J. Appl. Cryst.* **39**, 453-457.
